# Supplementary material for: A New Sulfated α-Ionone Glycoside from Sonchus erzincanicus Matthews
Source: PubMed Central journal article supplement (PMC6257313; doi:10.3390/molecules15042593), 2010-04-12

# Supporting Material

## A New Sulfated $\alpha$ -Ionone Glycoside from *Sonchus erzincanicus* Matthews

Ufuk ÖZGEN <sup>1,\*</sup>, Handan SEVİNDİK <sup>1</sup>, Cavit KAZAZ <sup>2</sup>, Demet YİĞİT <sup>3</sup>,  
Ali KANDEMİR <sup>3</sup>, Hasan SEÇEN <sup>2</sup>, İhsan ÇALIŞ <sup>4</sup>

### Corchoionoside C sulfate ester (3).

<sup>1</sup>H-NMR (400 MHz, CD<sub>3</sub>OD):  $\delta$  5.98 (1H, d, H-7, J=15.6 Hz), 5.87 (1H, bs, H-4), 5.70 (1H, dd, H-8, J=15.6 Hz, J=7.2 Hz), 4.50 (1H, quintet, H-9, J=6.8 Hz), 4.29 (1H, dd, H-6<sub>a</sub>', J=10.9 Hz, J=1.8 Hz), 4.26 (1H, d, H-1', J=7.7 Hz), 4.09 (1H, dd, H-6<sub>b</sub>', J=10.9 Hz, J=5.5 Hz), 3.28-3.36 (sugar protons, overlapped, 4H, H-2', H-3', H-4', H-5'), 2.63 (1H, d, H-2a, J=16.7 Hz), 2.16 (1H, d, H-2b, J=16.7 Hz), 1.94 (3H, d, H-13, J=1.1 Hz), 1.28 (3H, d, H-10, J=6.2 Hz), 1.03 (3H, s, H-11), 1.01 (3H, s, H-12).

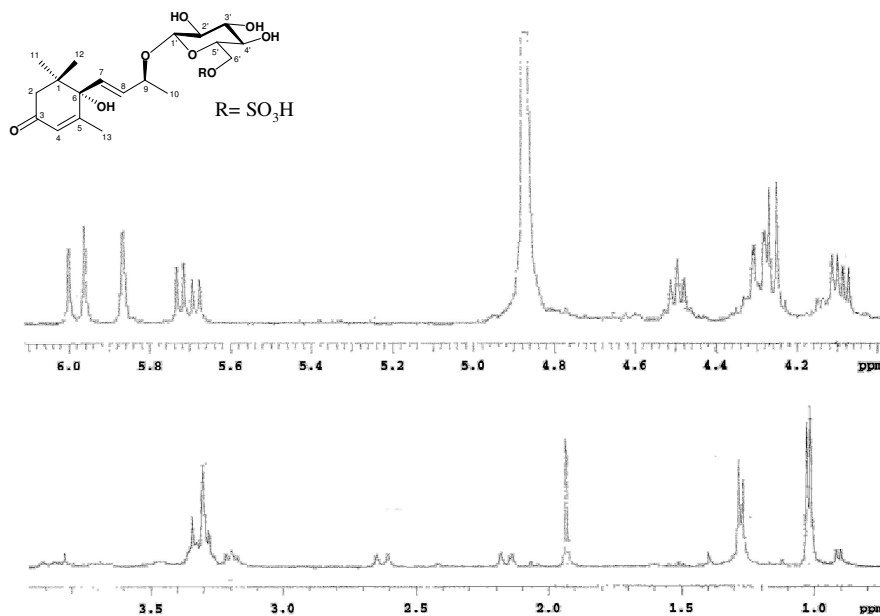

**Corchoionoside C sulfate ester (3).**

$^{13}\text{C-NMR}$  (100 MHz,  $\text{CD}_3\text{OD}$ ):  $\delta$  200.2 (C-3), 165.9 (C-5), 132.5 (C-7), 132.4 (C-8), 126.0 (C-4), 100.1 (C-1'), 78.8 (C-6), 76.9 (C-5'), 74.9 (C-3'), 73.7 (C-2'), 73.5 (C-9), 70.3 (C-4'), 67.1 (C-6'), 49.6 (C-2), 41.3 (C-1), 23.6 (C-12), 22.3 (C-11), 21.0 (C-10), 18.4 (C-13).

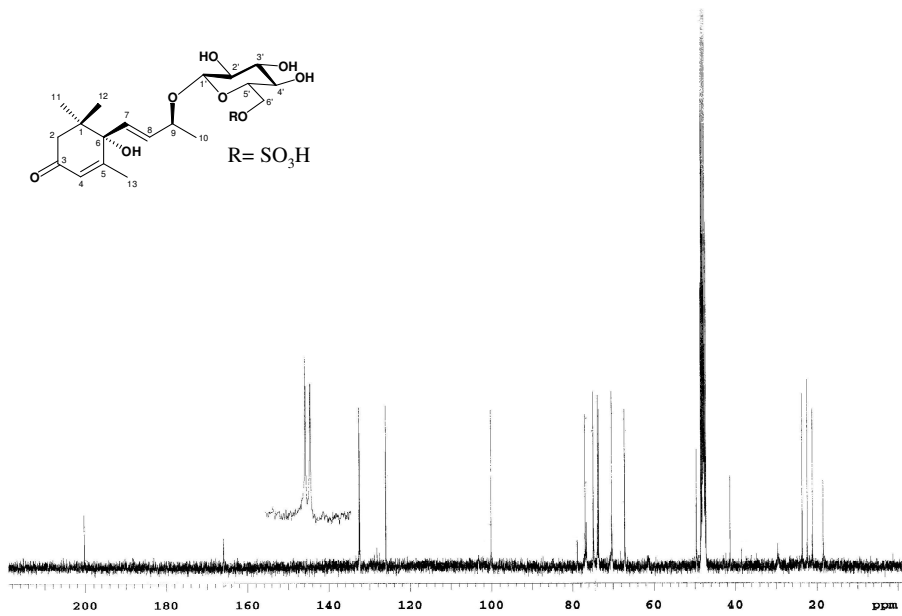

**Corchoionoside C sulfate ester (3).**

**ESI-MS** ( $C_{19}H_{30}O_{11}S$ ),  $m/e$ : 465  $[M-H]^-$  and 511  $[M-H+2Na]^-$

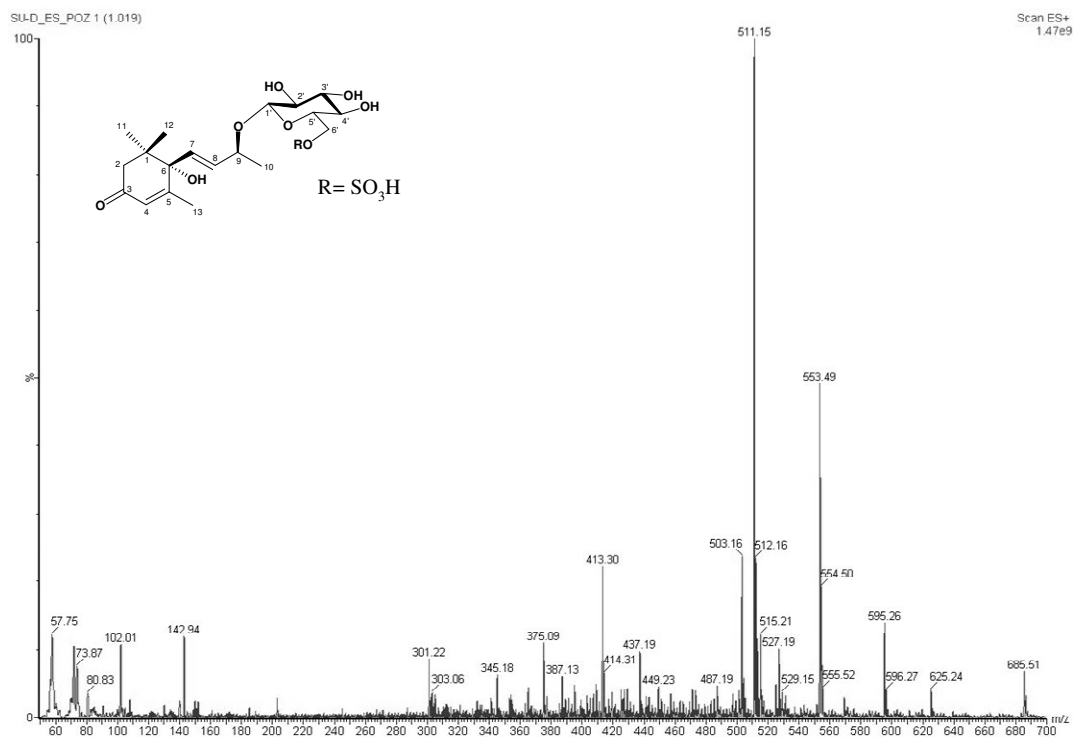

**Corchoionoside C sulfate ester (3).**

**ESI-MS** ( $C_{19}H_{30}O_{11}S$ ),  $m/e$ : 465  $[M-H]^-$  and 511  $[M-H+2Na]^-$

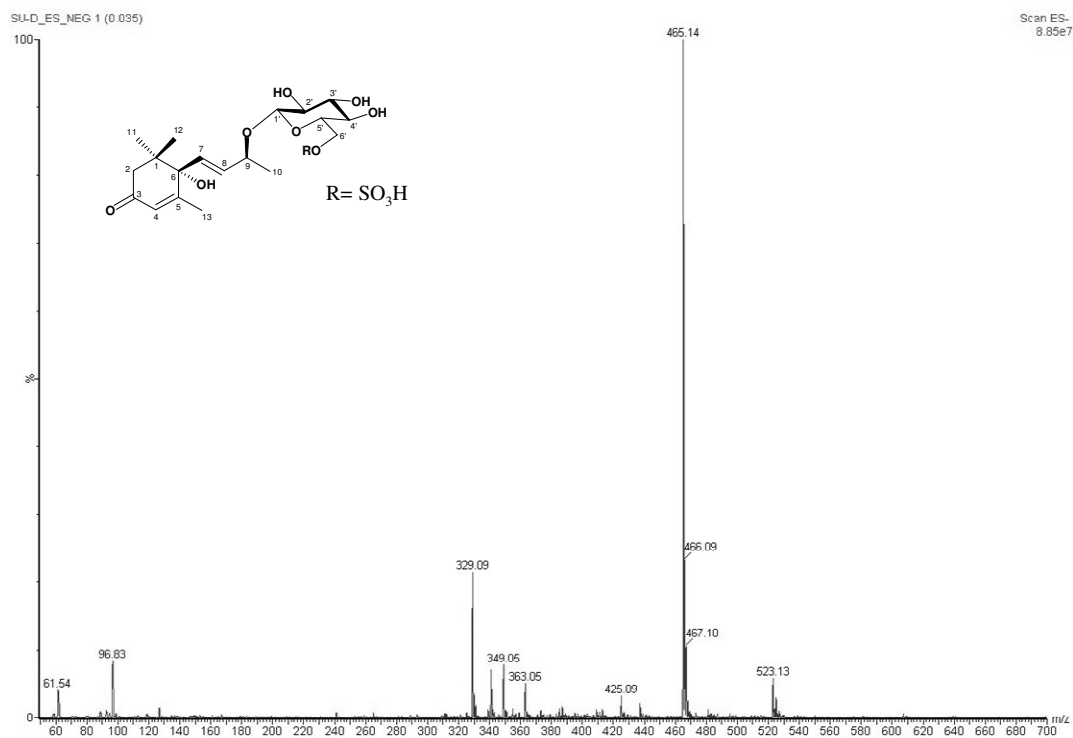

Corchoionoside C sulfate ester (3).

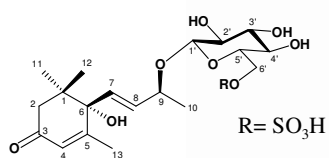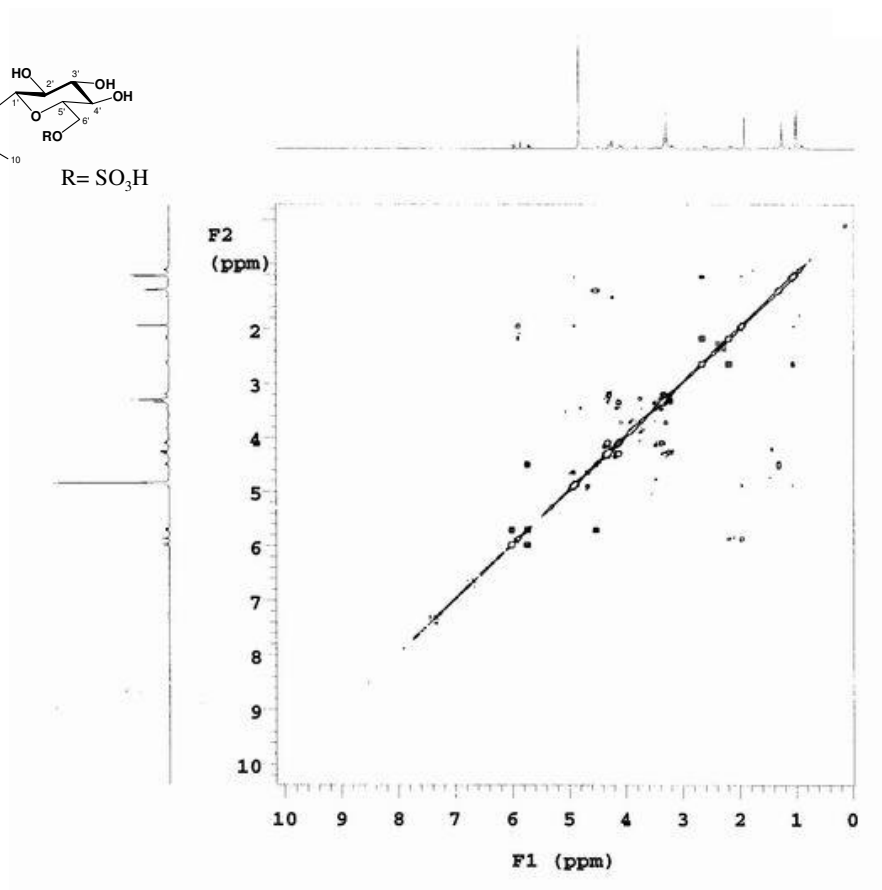

Corchoionoside C sulfate ester (3).

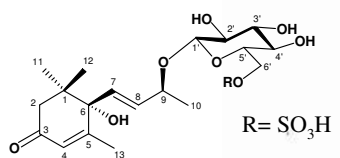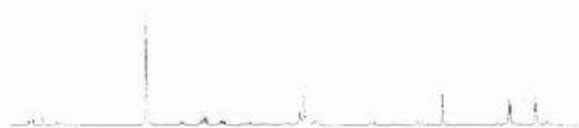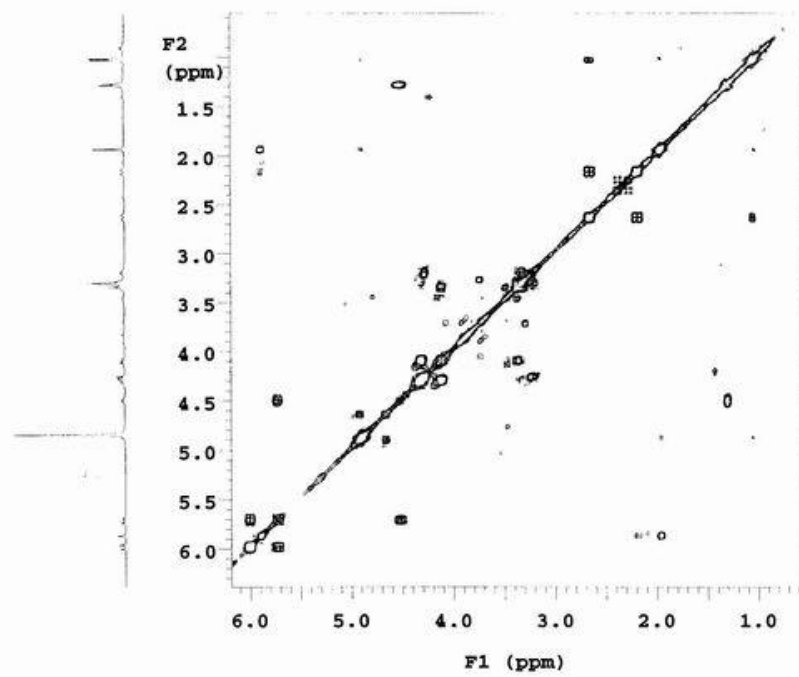

Corchoionoside C sulfate ester (3).

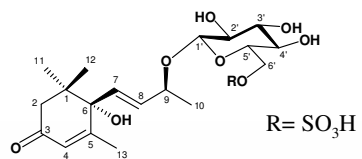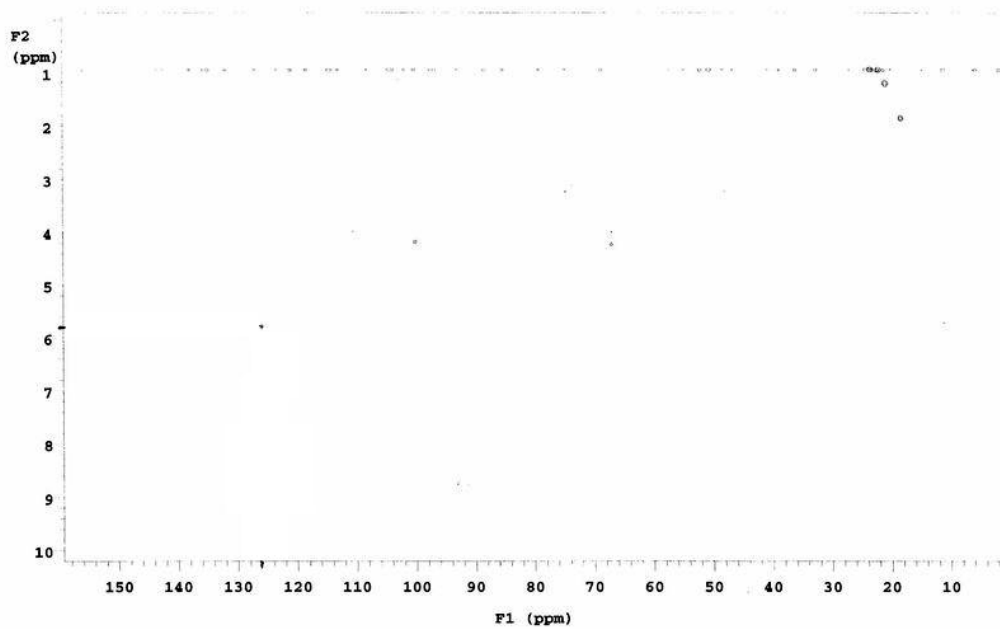

### Corchoionoside C sulfate ester (3).

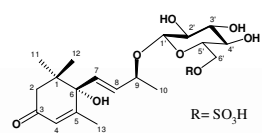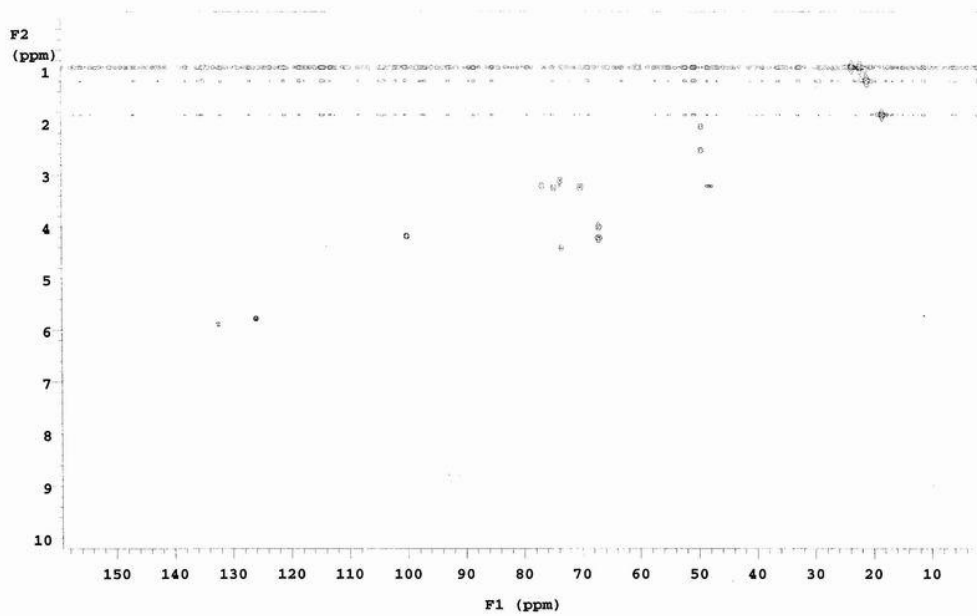



Corchoionoside C sulfate ester (3).

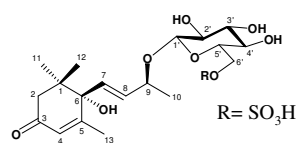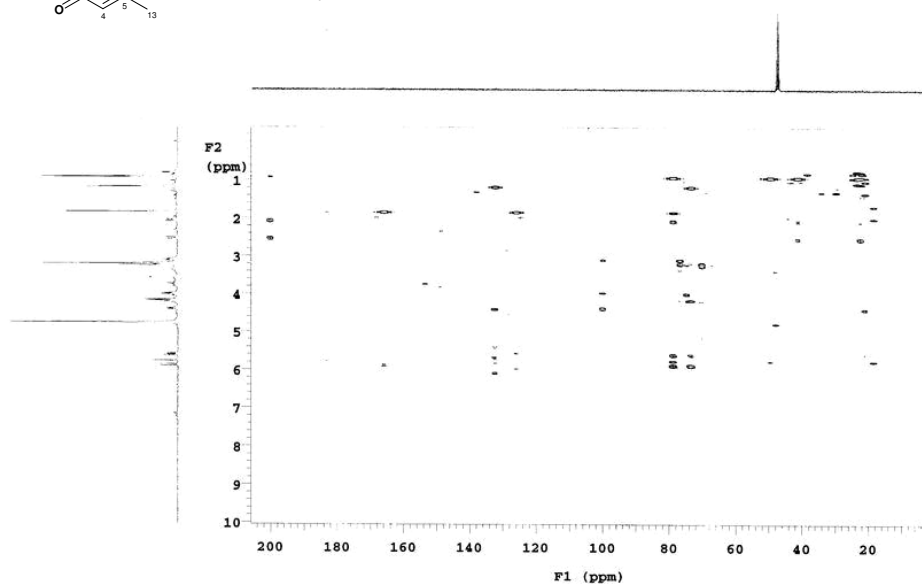

**Corchoionoside C sulfate ester (3).**

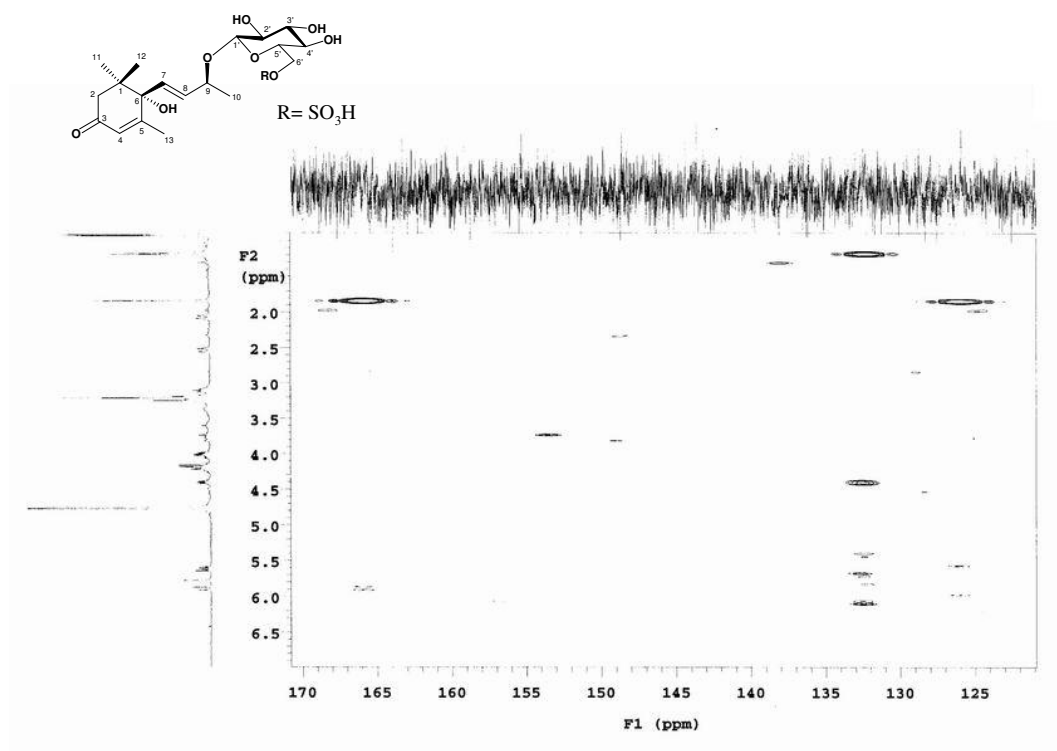

### Corchoionoside C sulfate ester (3).

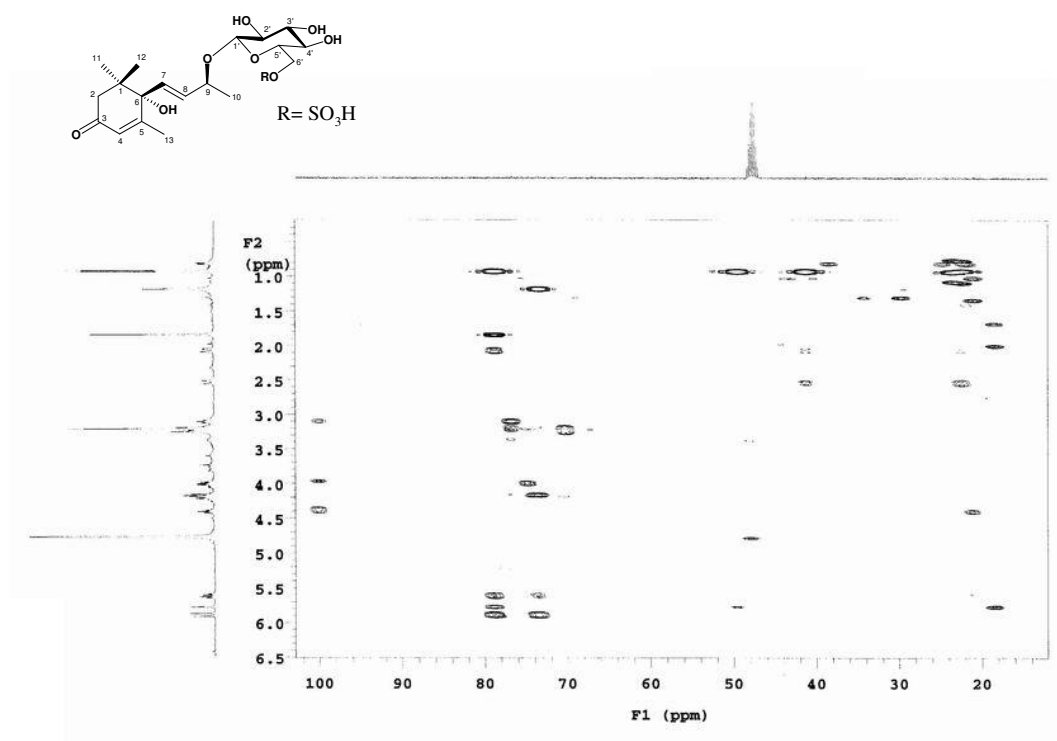

Supplement: molecules-15-02593-s001.pdf [file molecules-15-02593-s001.pdf]
